# Supplementary material for: Phylogeny and evolution of Lasiopodomys in subfamily Arvivolinae based on mitochondrial genomics
Source: PeerJ. 2021 Mar 16;9:e10850. doi: 10.7717/peerj.10850 (PMC7977381; doi:10.7717/peerj.10850)
Supplement: Supplemental Information 4 [file peerj-09-10850-s004.xls]

## Sheet: Sheet1
Appendix 4 Receiver operating characteristic curve (ROC) values for N. fuscus, L. brandtii, L. mandarinus, and L. gregalis under ecological niche models.
	L. brandtii	L. mandarinus	L. gregalis	Neodon fuscus
Present	0.993	0.987	0.946	0.998
Holocene-CCSM4	0.993	0.987	0.945	0.998
Holocene-MIROC	0.993	0.988	0.944	0.998
LGM-CCSM4	0.994	0.989	0.959	0.997
LGM-MIROC	0.994	0.992	0.967	0.997
LIG	0.993	0.985	0.925	0.998
